- versible direct factor IXa inhibitor in elective percutaneous coronary intervention (abstract). *Eur Heart J* 2009; 30:101 Abstract P686
136. Eriksson BI, Dahl OE, Lassen MR, Ward DP, Rothlein R, Davis G, Turpie AG, Fixit Study Group: Partial factor IXa inhibition with TTP889 for prevention of venous thromboembolism: An exploratory study. *J Thromb Haemost* 2008; 6:457-63
137. Kearon C, Comp P, Douketis J, Royds R, Yamada K, Gent M: Dose-response study of recombinant human soluble thrombomodulin (ART-123) in the prevention of venous thromboembolism after total hip replacement. *J Thromb Haemost* 2005; 3:962-8
138. Saito H, Maruyama I, Shimazaki S, Yamamoto Y, Aikawa N, Ohno R, Hirayama A, Matsuda T, Asakura H, Nakashima M, Aoki N: Efficacy and safety of recombinant human soluble thrombomodulin (ART-123) in disseminated intravascular coagulation: Results of a phase III, randomized, double-blind clinical trial. *J Thromb Haemost* 2007; 5:31-41
139. Herbert JM, Hérault JP, Bernat A, Savi P, Schaeffer P, Driguez PA, Duchaussoy P, Petitou M: SR123781A, a synthetic heparin mimetic. *Thromb Haemost* 2001; 85: 852-60
140. Bal dit Sollier C, Kang C, Berge N, Hérault JP, Bonneau M, Herbert JM, Drouet L: Activity of a synthetic hexadecasaccharide (SanOrg123781A) in a pig model of arterial thrombosis. *J Thromb Haemost* 2004; 2:925-30
141. Lassen MR, Dahl O, Mismetti P, Zielske D, Turpie AG: SR123781A: A new once-daily synthetic oligosaccharide anticoagulant for thromboprophylaxis after total hip replacement surgery: The DRIVE (Dose Ranging Study in Elective Total Hip Replacement Surgery) study. *J Am Coll Cardiol* 2008; 51:1498-504

## ANESTHESIOLOGY REFLECTIONS

### Grandfather Crawford Long, M.D.

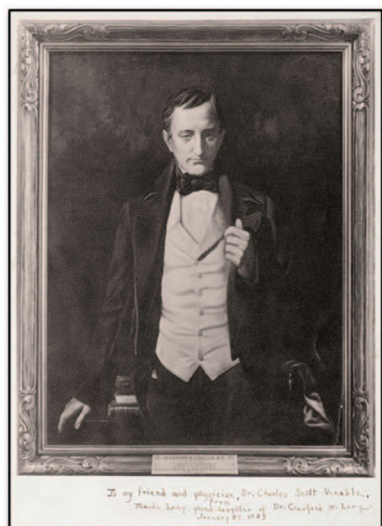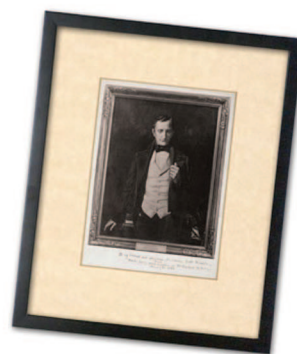

To my friend and physician, Dr. Charles Scott Venable,  
from  
Maude Long, grand-daughter of Dr. Crawford W. Long -  
January 25, 1935

In Jefferson, Georgia, on March 30, 1842, Crawford W. Long, M.D. (1815–1878), etherized James M. Venable to remove a neck tumor. In the Wood Library-Museum, a photograph of an oil portrait honoring Long is mat-inscribed to another Venable: “To my friend and physician, Dr. Charles Scott Venable, from Maude Long, grand-daughter of Dr. Crawford W. Long—January 25, 1935.” As early as 1907, Dr. Venable had written about the safety of Crawford Long’s anesthetic in an article titled “The Use of Adrenalin during Ether Anesthesia.” (Copyright © the American Society of Anesthesiologists, Inc. This image appears in color in the *Anesthesiology Reflections* online collection available at [www.anesthesiology.org](http://www.anesthesiology.org).)

George S. Bause, M.D., M.P.H., Honorary Curator, ASA’s Wood Library-Museum of Anesthesiology, Park Ridge, Illinois, and Clinical Associate Professor, Case Western Reserve University, Cleveland, Ohio. [UJYC@aol.com](mailto:UJYC@aol.com).
